# Supplementary material for: Introgression of Sub1 (SUB1) QTL in mega rice cultivars increases ethylene production to the detriment of grain- filling under stagnant flooding
Source: PubMed Central journal article supplement (PMC6898156; doi:10.1038/s41598-019-54908-2), 2019-12-06
Supplement: 41598_2019_54908_MOESM1_ESM.pdf [file 41598_2019_54908_MOESM1_ESM.pdf]

**Introgression of *Sub1* (*SUB1*) QTL in mega rice cultivars increases ethylene production to the detriment of grain- filling under stagnant flooding.**

Sandhya Rani Kuanar<sup>a, c</sup> , Kutubuddin Ali Molla<sup>a</sup>, Krishnendu Chattopadhyay<sup>a</sup>, Ramani Kumar Sarkar<sup>a</sup> , Pravat Kumar Mohapatra<sup>b \*</sup>

<sup>a</sup>ICAR-National Rice Research Institute, Cuttack, Odisha 753 006, India.

<sup>b</sup>School of Life Science, Sambalpur University, Jyoti vihar, Sambalpur 768019, India.

<sup>c</sup> Present address- Anchal College, Padampur, 768036, India

\*Corresponding author

Email IDs:

Sandhya Rani Kuanar: [sandhya\\_kuanar@rediffmail.com](mailto:sandhya_kuanar@rediffmail.com)

Kutubuddin Ali Molla: [Kutubuddin.Molla@icar.gov.in](mailto:Kutubuddin.Molla@icar.gov.in)

Krishnendu Chattopadhyay: [krishnenducrri@gmail.com](mailto:krishnenducrri@gmail.com)

Ramani Kumar Sarkar: [rksarkarcrr@gmail.com](mailto:rksarkarcrr@gmail.com)

Pravat Kumar Mohapatra: [pravat1948@rediffmail.com](mailto:pravat1948@rediffmail.com) Mobile -91-9937103747

Legend for figures

**Fig. S1** Effect of SF on grain yield of main shoot. Refer Fig.1 for symbols.

**Fig.S2** Effect of SF on grain-filling rate of main shoot. Refer Fig.1 for symbols.

**Fig. S3:** Relative mRNA level of various isoforms of ethylene biosynthetic genes ACC-synthase and ACC-oxidase in panicle of Swarna and Swarna-Sub1 (A) and Savitri and Savitri-Sub1 (B) under SF during 2014 compared to control on -3,0 and 3 days from anthesis. The horizontal bars indicate mean  $\pm$  standard deviation (n = 3). Absence of bar at any point indicates that the value was too small for representation.

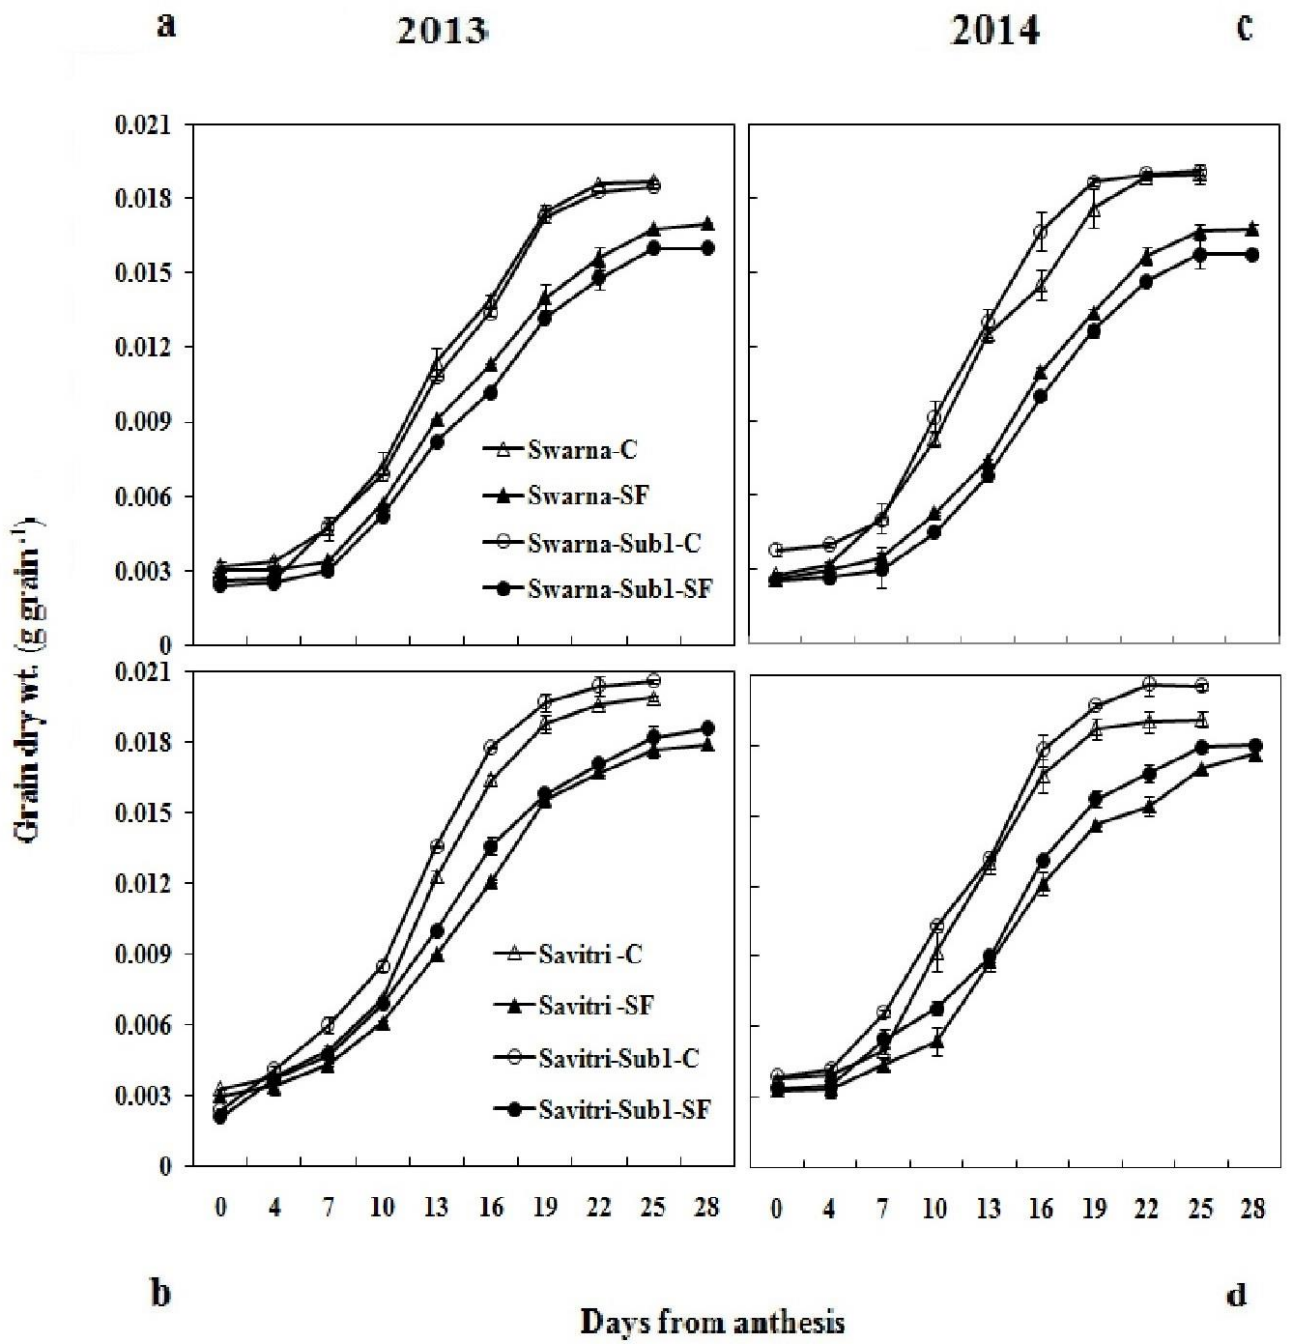

Fig. S1

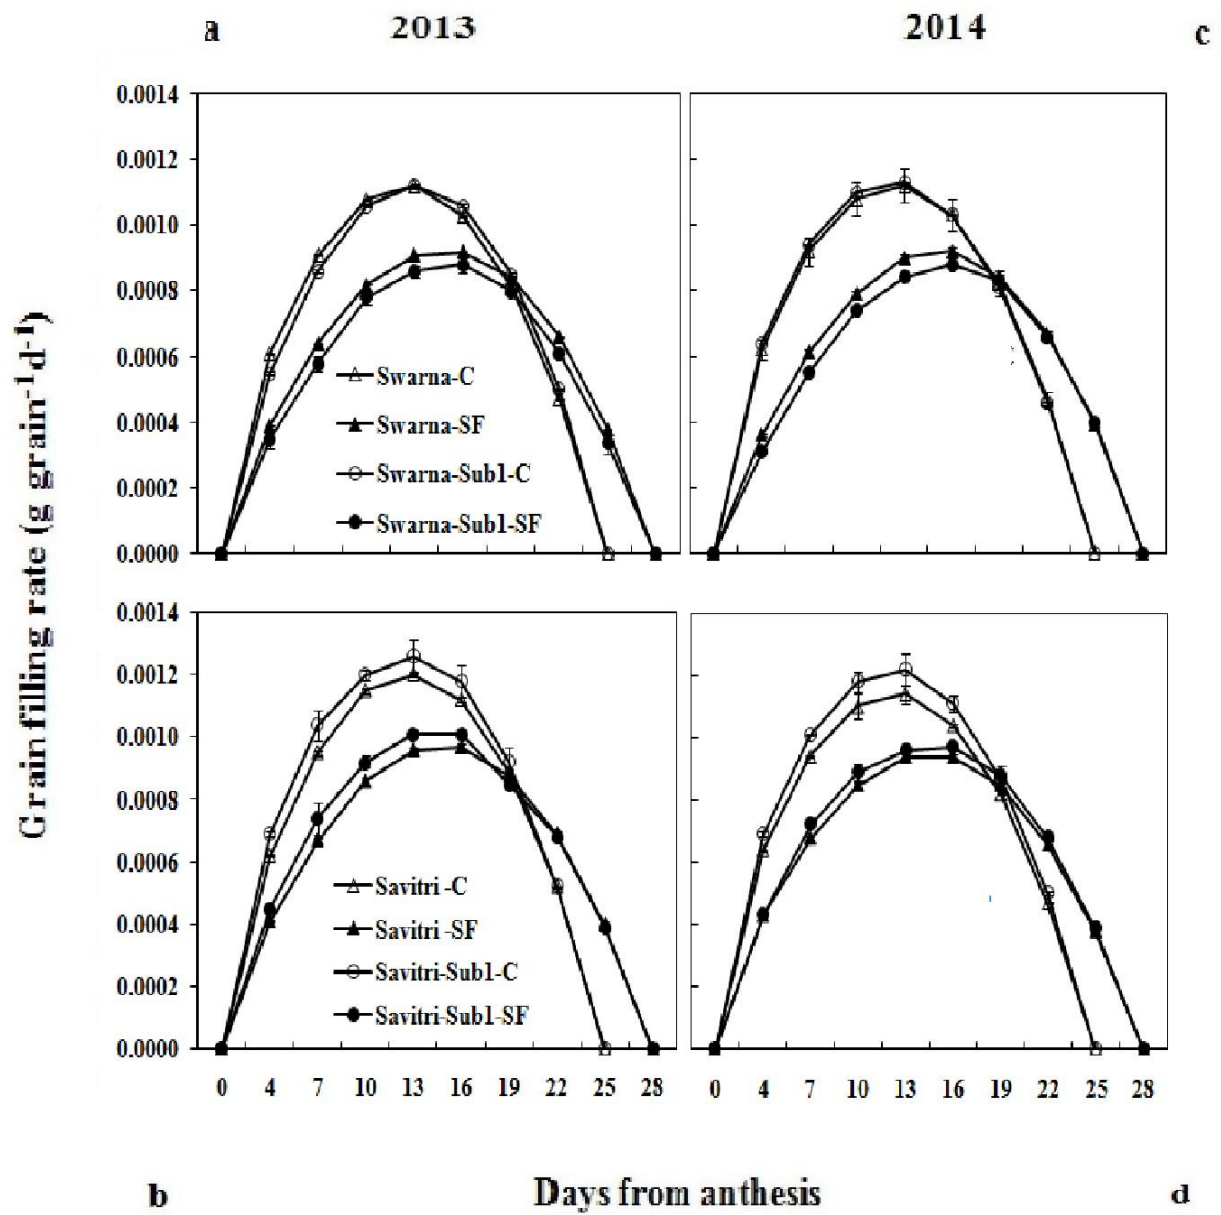

Fig.S2

**a**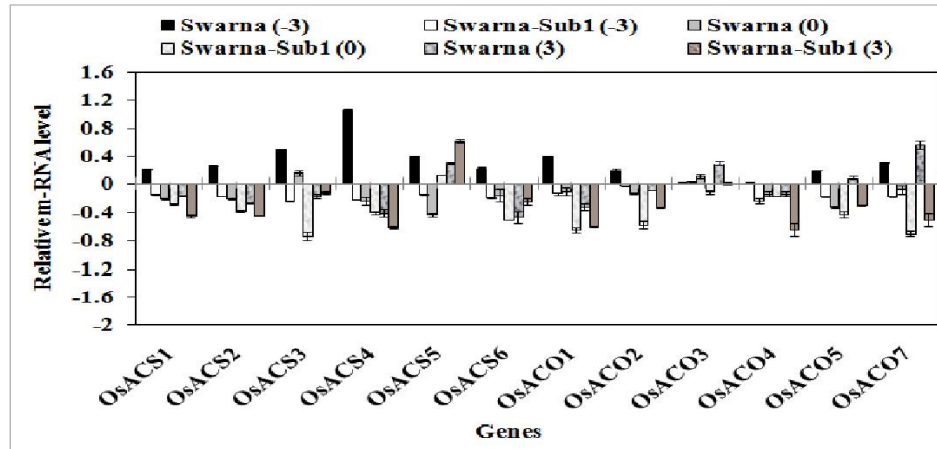**b**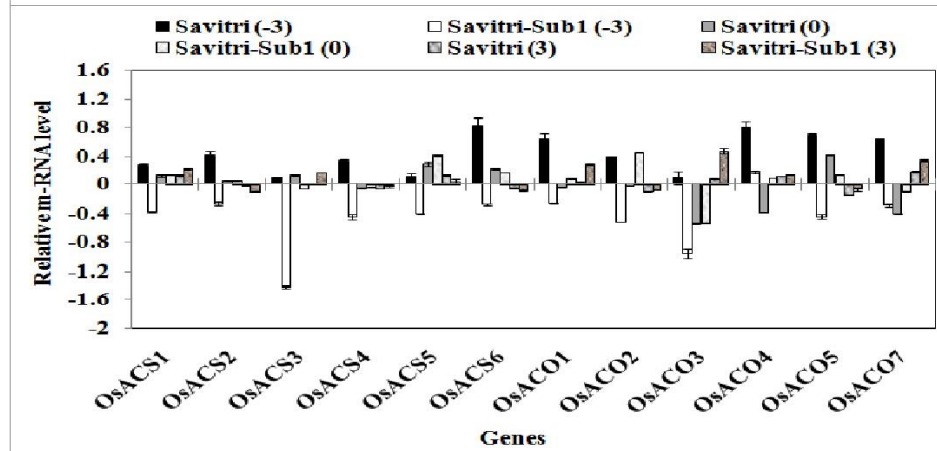

Fig. S3

**Table S1**

A.

| Genotype                  | Treatment     | Panicle weight (g) | Grain weight (g panicle <sup>-1</sup> ) | Filled grain (%) | Panicle number (m <sup>-2</sup> ) | Grain weight (g m <sup>-2</sup> ) | Straw weight (g m <sup>-2</sup> ) |
|---------------------------|---------------|--------------------|-----------------------------------------|------------------|-----------------------------------|-----------------------------------|-----------------------------------|
| Swarna                    | C             | 2.78±0.05          | 2.56±0.06                               | 83±2             | 246±10                            | 635±10.8                          | 666±14.6                          |
|                           | SF            | 2.71±0.07          | 2.40±0.09                               | 79±11            | 178±18                            | 464±15.2                          | 601±21.3                          |
| Swarna-Sub1               | C             | 2.92±0.03          | 2.61±0.05                               | 85±3             | 240±08                            | 626±11.7                          | 671±14.3                          |
|                           | SF            | 1.57±0.09          | 1.21±0.10                               | 58±14            | 123±16                            | 187±16.2                          | 495±18.1                          |
| Savitri                   | C             | 2.81±0.04          | 2.52±0.07                               | 75±4             | 264±09                            | 654±9.3                           | 834±13.9                          |
|                           | SF            | 2.64±0.05          | 2.24±0.11                               | 68±9             | 186±17                            | 443±18.6                          | 685±24.0                          |
| Savitri-Sub1              | C             | 3.08±0.07          | 2.58±0.06                               | 74±4             | 255±09                            | 657±13.2                          | 824±12.8                          |
|                           | SF            | 2.80±0.10          | 2.28±0.12                               | 64±15            | 132±15                            | 325±19.9                          | 658±20.1                          |
| LSD <sub>*p&lt;0.05</sub> | Variety (V)   | 0.48               | 0.45                                    | 6                | 36                                | 70                                | 78                                |
|                           | Treatment (T) | 0.34               | 0.31                                    | 5                | 26                                | 50                                | 55                                |
|                           | V X T         | 0.68               | 0.63                                    | 9                | 52                                | 100                               | 110                               |

B.

|                           |               |           |           |       |        |          |          |
|---------------------------|---------------|-----------|-----------|-------|--------|----------|----------|
| Swarna                    | C             | 3.18±0.04 | 2.76±0.03 | 94±3  | 244±08 | 673±12.5 | 721±14.5 |
|                           | SF            | 3.11±0.06 | 2.68±0.05 | 81±8  | 182±13 | 488±14.9 | 518±20.8 |
| Swarna-Sub1               | C             | 3.15±0.03 | 2.66±0.04 | 93±2  | 249±09 | 662±11.8 | 703±16.0 |
|                           | SF            | 2.68±0.05 | 2.18±0.07 | 76±10 | 118±10 | 264±19.5 | 445±25.0 |
| Savitri                   | C             | 2.88±0.03 | 2.52±0.03 | 79±5  | 270±12 | 680±10.6 | 926±15.4 |
|                           | SF            | 2.74±0.05 | 2.27±0.08 | 66±12 | 223±14 | 468±16.7 | 723±24.7 |
| Savitri-Sub1              | C             | 2.97±0.06 | 2.59±0.05 | 82±5  | 265±11 | 686±10.2 | 966±12.8 |
|                           | SF            | 2.82±0.08 | 2.25±0.07 | 65±13 | 165±13 | 363±18.0 | 717±23.5 |
| LSD <sub>*p&lt;0.05</sub> | Variety (V)   | 0.33      | 0.37      | 5     | 21     | 55       | 104      |
|                           | Treatment (T) | 0.24      | 0.26      | 3     | 15     | 39       | 73       |
|                           | V X T         | 0.47      | 0.53      | 7     | 30     | 78       | 147      |

The effect of SF on yield and yield attributes of primary and secondary tillers (except main shoot) of rice cultivars Swarna and Savitri with and without *Sub1* during wet season of 2013 (A) and 2014 (B). To calculate grain weight and straw weight m<sup>-2</sup> main shoot was also included. The data represented as mean ± standard deviation (n = 3) for 2013 and (n = 6) for 2014; [C-Control, SF- Stagnant flooding]

**Table S2**

A.

| Genotype     | Treatment | Flowering date | Maturity date | Plant height (cm) | Panicle weight (g) | Grain weight (g) panicle <sup>-1</sup> | Filled grain no. Panicle <sup>-1</sup> | Unfilled grain no. Panicle <sup>-1</sup> | Filled grain (%) |
|--------------|-----------|----------------|---------------|-------------------|--------------------|----------------------------------------|----------------------------------------|------------------------------------------|------------------|
| Swarna       | C         | Oct'16         | Nov'16        | 115±0.8           | 3.50±0.04          | 3.27±0.04                              | 163±9                                  | 20±2                                     | 89±1             |
|              | SF        | Oct'19         | Nov'22        | 133±1.5           | 3.35±0.06          | 3.10±0.05                              | 173±8                                  | 25±2                                     | 87±2             |
| Swarna-Sub1  | C         | Oct'20         | Nov'22        | 111±1.0           | 3.57±0.03          | 3.33±0.05                              | 184±6                                  | 18±2                                     | 91±1             |
|              | SF        | Oct'25         | Dec'3         | 115±1.4           | 3.32±0.07          | 3.04±0.07                              | 172±2                                  | 40±4                                     | 81±1             |
| Savitri      | C         | Nov'10         | Dec'12        | 116±0.9           | 3.74±0.03          | 3.41±0.03                              | 170±5                                  | 32±3                                     | 85±2             |
|              | SF        | Nov'13         | Dec'17        | 127±1.8           | 3.64±0.04          | 3.19±0.06                              | 154±7                                  | 40±5                                     | 79±4             |
| Savitri-Sub1 | C         | Oct'30         | Nov'30        | 114±0.7           | 4.03±0.05          | 3.90±0.05                              | 164±4                                  | 31±3                                     | 84±1             |
|              | SF        | Nov'3          | Dec'07        | 118±1.4           | 3.84±0.06          | 3.44±0.04                              | 180±3                                  | 56±2                                     | 75±1             |
|              |           | LSD*p<0.05     | Variety (V)   | 4                 | 0.14               | 0.18                                   | 8                                      | 5                                        | 2.9              |
|              |           |                | Treatment (T) | 3                 | 0.10               | 0.12                                   | 6                                      | 4                                        | 2.0              |
|              |           |                | V X T         | 5                 | 0.19               | 0.25                                   | 11                                     | 7                                        | 4.0              |

B.

|              |    |            |               |         |           |           |       |      |      |
|--------------|----|------------|---------------|---------|-----------|-----------|-------|------|------|
| Swarna       | C  | Oct'1      | Oct'31        | 112±0.9 | 3.85±0.04 | 3.71±0.04 | 182±4 | 13±4 | 93±2 |
|              | SF | Oct'7      | Nov'10        | 126±1.3 | 3.68±0.08 | 3.50±0.05 | 180±7 | 27±3 | 87±4 |
| Swarna-Sub1  | C  | Oct'4      | Nov'4         | 109±0.8 | 3.90±0.05 | 3.62±0.03 | 186±6 | 17±3 | 91±2 |
|              | SF | Oct'12     | Nov'17        | 112±1.4 | 3.58±0.09 | 3.23±0.07 | 183±4 | 39±5 | 83±2 |
| Savitri      | C  | Oct'25     | Nov'26        | 115±1.1 | 3.95±0.03 | 3.50±0.02 | 169±7 | 30±4 | 85±2 |
|              | SF | Oct'29     | Dec'1         | 129±1.4 | 3.77±0.07 | 3.26±0.06 | 151±9 | 41±4 | 79±2 |
| Savitri-Sub1 | C  | Oct'20     | Nov'20        | 117±1.0 | 4.43±0.03 | 4.05±0.04 | 174±1 | 31±4 | 85±2 |
|              | SF | Oct'25     | Nov'27        | 120±1.6 | 4.22±0.04 | 3.72±0.06 | 172±8 | 65±7 | 73±4 |
|              |    | LSD*p<0.05 | Variety (V)   | 2       | 0.15      | 0.16      | 7     | 5    | 2.2  |
|              |    |            | Treatment (T) | 3       | 0.10      | 0.12      | 5     | 4    | 2.0  |
|              |    |            | V X T         | 3       | 0.21      | 0.22      | 10    | 7    | 3.1  |

. The effect of SF on yield and yield attributes of main shoot of rice plant with and without *SUB1* during wet season of 2013 (A) and 2014 (B). The value represented as mean ± standard deviation (n = 3) for 2013 and (n = 6) for 2014; Oct, October; Nov, November; Dec, December; C, Control; SF, Stagnant flooding.
